# Supplementary material for: Amygdalar Functional Connectivity Differences Associated With Reduced Pain Intensity in Pediatric Peripheral Neuropathic Pain
Source: PubMed Central journal article supplement (PMC9184677; doi:10.3389/fpain.2022.918766), 2022-05-27
Supplement: Data_Sheet_1.pdf [file Data_Sheet_1.pdf]

## Supplementary Material

### 1 Supplementary Figures

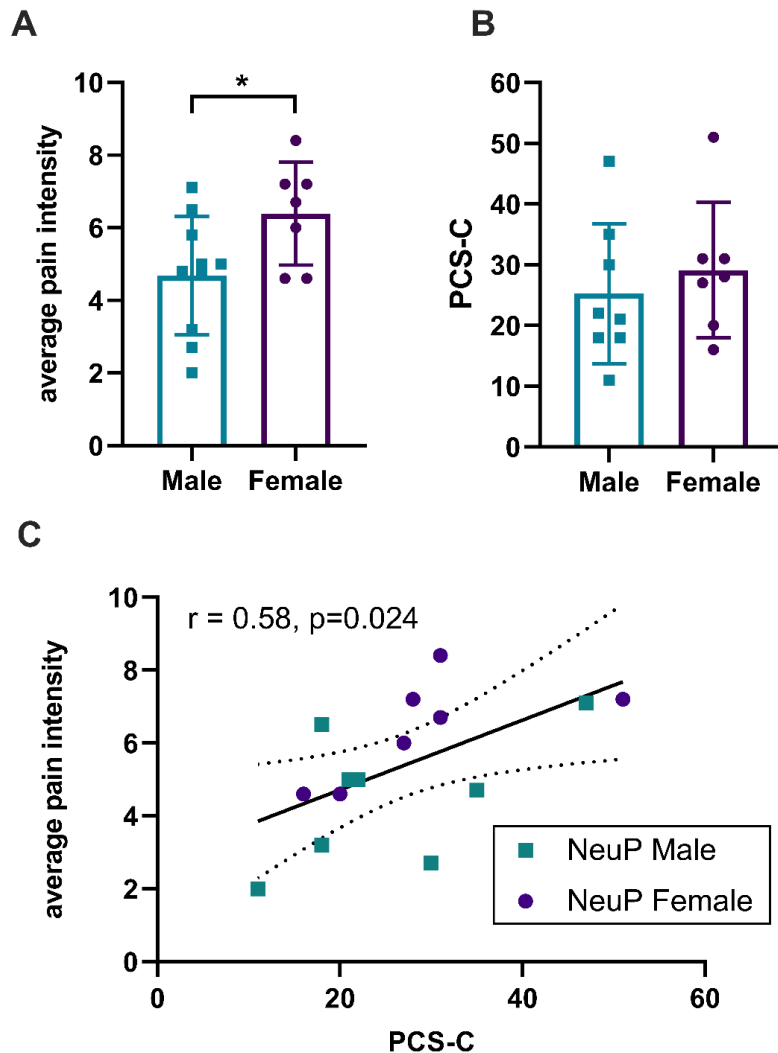

**Supplementary Figure 1. Pain ratings and pain catastrophizing in adolescents with NeuP.** (A) Individual participant ratings for average pain intensity in the last week, plotted separately for male and female NeuP patients. (B) Individual participant pain catastrophizing scores, plotted separately for male and female NeuP patients. (C) Pain catastrophizing correlated positively with average pain intensity in the last week;  $n=15$ . (A-B) Data points represent individual values; bars represent mean [SD]; asterisk indicates significance at  $P<0.05$ . (C) Data points represent individual values; solid lines represent regression line for correlation; dotted lines represent 95% confidence interval. *Abbreviations:* NeuP, neuropathic pain; PCS-C, Pain Catastrophizing Scale, child version.

## 2 Supplementary Tables

**Supplementary Table 1. Comparative ICA-AROMA independent component and head motion data for patients and control participants.**

|                        | NeuP (n=17)                        | HC (n=17)                          | Group Comparisons         | Effect size |
|------------------------|------------------------------------|------------------------------------|---------------------------|-------------|
| Independent Components |                                    |                                    |                           |             |
| Mean ICs               | 72.5±10.2                          | 70.0±8.7                           | $t_{(32)}=0.473, P=0.640$ | 0.158       |
| Mean %noise ICs        | 57±9                               | 53±13                              | $t_{(32)}=0.918, P=0.365$ | 0.307       |
| Head motion            |                                    |                                    |                           |             |
| Mean FD (mm)           | 0.12<br>(0.11-0.16)<br>[0.08-0.28] | 0.12<br>(0.10-0.15)<br>[0.06-0.24] | $Z=0.60, P=0.547$         | 0.011       |
| Maximum FD (mm)        | 0.66<br>(0.36-1.04)<br>[0.22-1.76] | 0.44<br>(0.30-2.38)<br>[0.13-9.10] | $Z=0.36, P=0.718$         | 0.004       |

Data = mean±SD or, if assumptions of normality were not met, data = median (25<sup>th</sup>-75<sup>th</sup> percentile)[min-max]. Effect size =  $\eta^2$  for Mann-Whitney tests and Hedge's  $g$  for independent samples t-tests. Standardised test statistic (Z-value) is reported for Mann-Whitney test.

*Abbreviations:* FD, framewise displacement (in millimetres); HC, healthy control participants; IC, independent component; NeuP, patients with neuropathic pain.

**Supplementary Table 2. Right amygdala rsFC network within adolescents with NeuP.**

| Brain Region                                        | Peak MNI |     |     | Peak T-value | Number of voxels |
|-----------------------------------------------------|----------|-----|-----|--------------|------------------|
|                                                     | X        | Y   | Z   |              |                  |
| <i>Positive rsFC</i>                                |          |     |     |              |                  |
| Right Amygdala                                      | 26       | 2   | -18 | 43.40        | 2402             |
| Right Parahippocampal Gyrus                         | 18       | 0   | -20 | 30.47        |                  |
| Right Hippocampus                                   | 22       | -8  | -14 | 24.80        |                  |
| Left Amygdala                                       | -24      | -6  | -10 | 16.43        | 1409             |
| Left Hippocampus                                    | -28      | -20 | -18 | 12.47        |                  |
| Left Amygdala                                       | -18      | 0   | -16 | 12.24        |                  |
| Left Inferior Temporal Gyrus                        | -46      | -50 | -24 | 5.77         | 247              |
| Left Fusiform Cortex                                | -36      | -42 | -26 | 5.74         |                  |
| Left Fusiform Cortex                                | -40      | -42 | -18 | 5.45         |                  |
| Left Primary Motor Cortex                           | -46      | -16 | 56  | 6.20         | 127              |
| Left Primary Somatosensory Cortex                   | -48      | -22 | 62  | 5.45         |                  |
| Right Middle Temporal Gyrus                         | 52       | -48 | -2  | 6.97         | 105              |
| Right Inferior Temporal Gyrus                       | 54       | -42 | -14 | 6.21         |                  |
| Posterior Midcingulate Cortex                       | 4        | -2  | 42  | 7.57         | 75               |
| Anterior Midcingulate Cortex                        | 6        | 6   | 34  | 6.28         |                  |
| Right Rectus Gyrus                                  | 8        | 48  | -18 | 5.32         | 67               |
| Left Frontal Medial Orbital Cortex                  | -6       | 40  | -12 | 5.07         |                  |
| Left Frontal Medial Orbital Cortex                  | 0        | 54  | -6  | 4.78         |                  |
| Left Primary Somatosensory Cortex                   | -66      | -14 | 20  | 6.33         | 65               |
| Subcallosal Cortex                                  | 4        | 6   | -2  | 5.91         | 64               |
| Subcallosal Cortex                                  | 2        | 8   | -16 | 5.85         |                  |
| Right Middle Temporal Gyrus/Inferior Temporal Gyrus | 64       | -34 | -18 | 8.92         | 59               |
| Right Primary Motor Cortex                          | 46       | -10 | 38  | 5.94         | 49               |
| Left Angular Gyrus                                  | -36      | -66 | 30  | 6.82         | 45               |
| Left Angular Gyrus                                  | -34      | -74 | 36  | 5.61         |                  |
| Right Premotor Cortex                               | 58       | 2   | 28  | 5.12         | 39               |
| Right Primary Motor Cortex                          | 60       | -2  | 18  | 4.93         |                  |
| Left Paracentral Lobule                             | -6       | -36 | 56  | 5.69         | 36               |
| <i>Negative rsFC</i>                                |          |     |     |              |                  |
| Right Dorsolateral Prefrontal Cortex                | 36       | 52  | 24  | -5.16        | 45               |
| Right Dorsolateral Prefrontal Cortex                | 32       | 46  | 18  | -5.01        |                  |
| Right Angular Gyrus                                 | 54       | -48 | 34  | -5.80        | 39               |

Peak MNI coordinates for brain regions with significant right amygdala rsFC in adolescents with NeuP, significant at cluster-corrected threshold  $P_{FDR} < 0.025$  and cluster-forming height threshold  $P < 0.001$  (uncorrected). *Abbreviations:* MNI, Montreal Neurological Institute.

**Supplementary Table 3. Right amygdala rsFC network within HC adolescents.**

| Brain Region                                               | Peak MNI |     |     | Peak<br>T-<br>value | Number<br>of<br>voxels |
|------------------------------------------------------------|----------|-----|-----|---------------------|------------------------|
|                                                            | X        | Y   | Z   |                     |                        |
| <i>Positive rsFC</i>                                       |          |     |     |                     |                        |
| Right Hippocampus                                          | 28       | -6  | -16 | 23.13               | 1904                   |
| Right Amygdala                                             | 28       | 2   | -20 | 13.90               |                        |
| Right Hippocampus/Parahippocampal Gyrus                    | 18       | -12 | -18 | 12.89               |                        |
| Left Hippocampus                                           | -22      | -10 | -16 | 9.98                | 771                    |
| Left Hippocampus                                           | -14      | -8  | -14 | 8.73                |                        |
| Left Parahippocampal Gyrus/Amygdala                        | -20      | 0   | -28 | 8.72                |                        |
| Right Superior Temporal Gyrus                              | 64       | -4  | 2   | 6.50                | 210                    |
| Right Superior Temporal Gyrus/Middle<br>Temporal Gyrus     | 62       | -2  | -10 | 6.42                |                        |
| Right Ventral Premotor Cortex                              | 60       | 0   | 14  | 5.82                |                        |
| Left Primary Somatosensory Cortex                          | -60      | -16 | 38  | 6.51                | 158                    |
| Left Primary Somatosensory Cortex                          | -58      | -24 | 40  | 4.40                |                        |
| Right Superior Temporal Pole                               | 48       | 24  | -24 | 7.10                | 124                    |
| Right Middle Temporal Pole                                 | 52       | 18  | -30 | 4.93                |                        |
| Right Primary Somatosensory Cortex                         | 62       | -10 | 36  | 5.48                | 113                    |
| Right Primary Motor Cortex                                 | 54       | -6  | 34  | 5.25                |                        |
| Right Primary Somatosensory Cortex/Primary<br>Motor Cortex | 64       | -2  | 32  | 4.52                |                        |
| Left Premotor Cortex                                       | -46      | -10 | 32  | 5.60                | 48                     |
| Right Temporooccipital Inferior Temporal Gyrus             | 46       | -56 | -14 | 6.30                | 45                     |

Peak MNI coordinates for brain regions with significant right amygdala rsFC in HC adolescents, significant at cluster-corrected threshold  $P_{FDR} < 0.025$  and cluster-forming height threshold  $P < 0.001$  (uncorrected). *Abbreviations:* MNI, Montreal Neurological Institute.

**Supplementary Table 4. Left amygdala rsFC network within adolescents with NeuP.**

| Brain Region                                           | Peak MNI |     |     | Peak T-value | Number of voxels |
|--------------------------------------------------------|----------|-----|-----|--------------|------------------|
|                                                        | X        | Y   | Z   |              |                  |
| <i>Positive rsFC</i>                                   |          |     |     |              |                  |
| Left Amygdala                                          | -18      | 0   | -18 | 38.33        | 2940             |
| Left Hippocampus                                       | -26      | -4  | -20 | 31.10        |                  |
| Left Parahippocampal Gyrus/Fusiform Cortex             | -26      | -2  | -30 | 16.30        |                  |
| Right Hippocampus                                      | 30       | -20 | -14 | 13.05        | 1295             |
| Right Parahippocampal Gyrus                            | 16       | -2  | -18 | 12.74        |                  |
| Right Amygdala                                         | 28       | -6  | -14 | 10.87        |                  |
| Left Primary Somatosensory Cortex                      | -64      | -8  | 16  | 7.41         | 212              |
| Left Primary Somatosensory Cortex/Primary Motor Cortex | -60      | -4  | 30  | 7.23         |                  |
| Left Somatosensory Cortex                              | -68      | -10 | 24  | 5.23         |                  |
| Right Cerebellum/Fusiform Cortex                       | 36       | -42 | -26 | 6.23         | 191              |
| Right Cerebellum                                       | 14       | -52 | -18 | 5.98         |                  |
| Right Cerebellum                                       | 34       | -34 | -30 | 5.32         |                  |
| Anterior Midcingulate Cortex                           | -2       | -2  | 36  | 10.52        | 125              |
| Anterior Midcingulate Cortex                           | 6        | 4   | 36  | 9.07         |                  |
| Left Superior Temporal Gyrus                           | -54      | -6  | -4  | 7.06         | 86               |
| Left Middle Temporal Gyrus                             | -62      | -14 | -2  | 5.59         |                  |
| Left Middle Temporal Gyrus                             | -58      | -12 | -10 | 5.01         |                  |
| Left Primary Motor Cortex                              | -42      | -18 | 68  | 5.87         | 85               |
| Left Primary Motor Cortex                              | -42      | -14 | 60  | 5.42         |                  |
| Left Primary Motor Cortex                              | -40      | -10 | 52  | 5.08         |                  |
| Right Lateral Orbitofrontal Cortex                     | 30       | 30  | -16 | 6.59         | 43               |

Peak MNI coordinates for brain regions with significant left amygdala rsFC in adolescents with NeuP, significant at cluster-corrected threshold  $P_{FDR} < 0.025$  and cluster-forming height threshold  $P < 0.001$  (uncorrected). *Abbreviations:* MNI, Montreal Neurological Institute.

**Supplementary Table 5. Left amygdala rsFC network within HC adolescents.**

| Brain Region                                           | Peak MNI |     |     | Peak<br>T-<br>value | Number<br>of<br>voxels |
|--------------------------------------------------------|----------|-----|-----|---------------------|------------------------|
|                                                        | X        | Y   | Z   |                     |                        |
| <i>Positive rsFC</i>                                   |          |     |     |                     |                        |
| Left Hippocampus/Amygdala                              | -26      | -6  | -18 | 26.73               | 2095                   |
| Left Hippocampus/Amygdala                              | -18      | -6  | -12 | 18.21               |                        |
| Left Hippocampus                                       | -26      | -14 | -10 | 17.59               |                        |
| Right Hippocampus                                      | 24       | -14 | -10 | 10.32               | 887                    |
| Right Hippocampus/Parahippocampal Gyrus                | 30       | -12 | -20 | 9.48                |                        |
| Right Amygdala                                         | 26       | 0   | -10 | 8.06                |                        |
| Left Fusiform Cortex                                   | -40      | -46 | -22 | 6.00                | 87                     |
| Left Fusiform Cortex                                   | -30      | -46 | -20 | 4.54                |                        |
| Left Fusiform Cortex/Inferior Temporal Gyrus           | -46      | -52 | -18 | 4.52                |                        |
| Left Middle Temporal Gyrus                             | -54      | -60 | 0   | 5.85                | 83                     |
| Left Middle Temporal Gyrus/Lateral Occipital<br>Cortex | -46      | -64 | 2   | 5.50                |                        |
| Left Inferior Temporal Gyrus                           | -42      | -60 | -6  | 7.23                | 64                     |
| Left Fusiform Cortex                                   | -40      | -50 | -6  | 5.73                |                        |
| Pregenua Cingulate Cortex                              | -6       | 36  | 2   | 7.04                | 48                     |
| Pregenua Cingulate Cortex                              | 2        | 34  | 12  | 4.58                |                        |
| Left Lateral Orbitofrontal Cortex                      | -40      | 28  | -16 | 4.84                | 46                     |
| Left Lateral Orbitofrontal Cortex                      | -42      | 36  | -20 | 4.84                |                        |

Peak MNI coordinates for brain regions with significant left amygdala rsFC in HC adolescents, significant at cluster-corrected threshold  $P_{FDR} < 0.025$  and cluster-forming height threshold  $P < 0.001$  (uncorrected). *Abbreviations:* MNI, Montreal Neurological Institute.
